# Supplementary material for: Different Evolutionary History for Basque Diaspora Populations in USA and Argentina Unveiled by Mitochondrial DNA Analysis
Source: PLoS One. 2015 Dec 14;10(12):e0144919. doi: 10.1371/journal.pone.0144919 (PMC4679185; doi:10.1371/journal.pone.0144919)
Supplement: S3 Table — The relative frequency (%) of each haplotype is indicated. (XLSX) [file pone.0144919.s003.xlsx]

## Sheet: Hoja1
	Table S3. Haplotypes of Basque Diaspora populations shared with Basque populations from Spain and France. The relative frequency (%) of each haplotype is indicated.
	*Length polymorphisms in 16193, 309, 315, 523,524 and 573 are not included in the following haplotypes
			Relative frequency (%) of each haplotype in the studied groups
	Haplotype*	Haplogroup	USA-DDV (n=81)	USA-DDA (n=94)	ARG-DDV (n=72)	ARG-DDA (n=122)	Spanish Basque population (n=206)	French Basque population (n=193)
	16051G, 16129C, 16183C, 16189C, 16362C, 16519C, 73G, 152C, 217C, 263G, 340T, 508G	U2e1	-	1064	-	-	2913	-
	16069T, 16126C, 16148T, 16193T, 16278T, 73G, 150T, 152C, 263G, 295T, 489C	J2b1a	1235	-	-	-	3398	1036
	16069T, 16126C, 16278T, 16366T, 16519C, 73G, 185A, 188G, 228A, 263G, 295T, 462T, 489C	J1c2e2	1235	1064	-	-	0.971	0.518
	16069T, 16126C, 16300G, 73G, 185A, 228A, 263G, 295T, 462T, 489C	J1c5c1	2469	-	-	2459	1456	2591
	16093C, 16519C, 93G, 263G	R0	-	2128	-	-	0.971	2073
	16126C, 16163G, 16186T, 16189C, 16294T, 16519C, 73G, 152C, 195C, 263G	T1a1'3	-	2128	1389	-	1456	0.518
	16126C, 16294T, 16296T, 16519C, 73G, 263G	T2	-	1064	-	0.820	0.485	1036
	16126C, 16294T, 16304C, 16519C, 73G, 263G	T2b	-	1064	-	-	0.485	0.518
	16129A, 16150T, 16519C, 263G	R0	2469	1064	-	-	0.485	-
	16129A, 16519C, 263G	R0	7407	2128	-	-	4369	4663
	16176T, 16519C, 195C, 263G	H3c2	-	-	-	0.820	0.485	-
	16176T, 195C, 263G	H3c2	1235	-	-	0.820	3883	2073
	16179T, 16356C, 16519C, 73G, 195C, 263G, 499A	U4c1	-	-	1389	-	-	0.518
	16181C, 16182C, 16183C, 16189C,16519C, 73G, 146C, 153G, 263G	X1'3	2469	1064	-	-	-	3109
	16192T, 16270T, 16319A, 16362C, 73G, 150T, 263G, 533G	U5b1f1a	-	-	-	0.820	0.971	-
	16192T, 16270T, 16319A, 73G, 150T, 263G, 533G	U5b1f1a	11111	1064	4167	7377	7767	15026
	16224C, 16311C, 16519C, 73G, 263G, 497T	K1a	-	-	1389	0.820	0.485	-
	16224C, 16519C, 73G, 152C, 263G, 497T	K1a4a1e	-	1064	-	1639	0.485	1036
	16233G, 195C, 263G	R0	1235	1064	-	-	0.485	-
	16240G, 16298C, 72C, 263G	V3a	-	2128	-	-	-	2591
	16278T, 16311C, 16519C, 73G, 263G, 497T	K1a	1235	-	1389	0.820	3883	0.518
	16291T, 16519C, 263G	R0	6173	2128	-	2459	3883	1554
	16298C, 16390A, 16519C, 263G	V21	-	-	-	0.820	0.971	1554
	16298C, 72C, 150T, 263G	HV0	2469	2128	1389	1639	3398	-
	16298C, 72C, 263G	HV0	-	-	1389	-	0.485	-
	16304C, 16519C, 93G, 263G, 456T, 513A	H5a3a1	1235	1064	-	1639	1456	1554
	16311C, 16519C, 263G	R0	-	1064	1389	-	-	1554
	16354T, 263G	H2a1		-	1389	-	-	1554
	16362C, 16482G, 16519C, 150T, 239C, 263G	H6a1a7	2469	-	-	-	-	0.518
	16362C, 16482G, 239C, 263G	H6	-	1064	-	-	0.485	-
	16519C, 150T, 263G	R0	-	2128	-	0.820	2913	1554
	16519C, 152C, 263G	R0	2469	3191	0.000	1639	0.971	0.518
	16519C, 152C, 263G, 477C	R0	-	-	-	0.820	-	0.518
	16519C, 182T, 200G, 263G	H3am	-	-	-	0.820	0.485	1036
	16519C, 263G	R0	4938	5319	6944	4918	4854	6736
	16519C, 93G ,263G	R0	1235	-	1389	0.820	0.485	1036
	73G, 263G	R0	1235	-	-	0.820	1942	1036
